# Supplementary material
Source: PubMed Central journal article supplement (PMC3166380)
Supplement: NIHMS305707-supplement-1_si_001.pdf [file NIHMS305707-supplement-1_si_001.pdf]

# Supporting figures for “Effectiveness of CID, HCD, and ETD with FT MS/MS for degradomic-peptidomic analysis: evaluations from different peptide identification methods” by Yufeng Shen<sup>1</sup>, Nikola Tolic<sup>2</sup>, Fang Xie<sup>1</sup>, Rui Zhao<sup>2</sup>, Samuel O. Purvine<sup>2</sup>, Athena A. Schepmoes<sup>1</sup>, Ronald, J. Moore<sup>1</sup>, Gordon A. Anderson<sup>1</sup>, and Richard D. Smith<sup>1,2</sup>

<sup>1</sup>Biological Sciences Division, and <sup>2</sup>Environmental Molecular Sciences Laboratory, Pacific Northwest National Laboratory, Richland, WA 99354

**Supporting Figure 1.** Optimization of ETD reaction time for fragmentation of CS 2 and 4 peptides.

ETD MS/MS of 547.6 m/z, +4

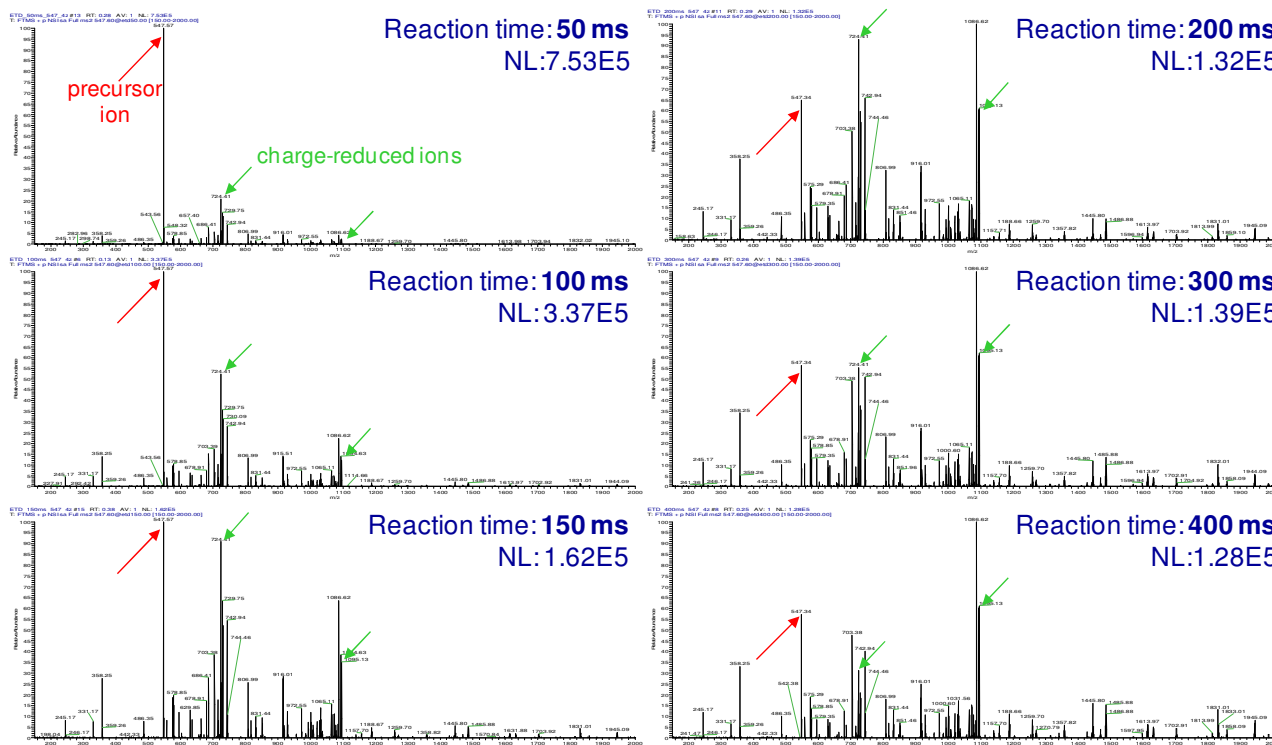

Continued.

### ETD MS/MS of 733.1 m/z, +4

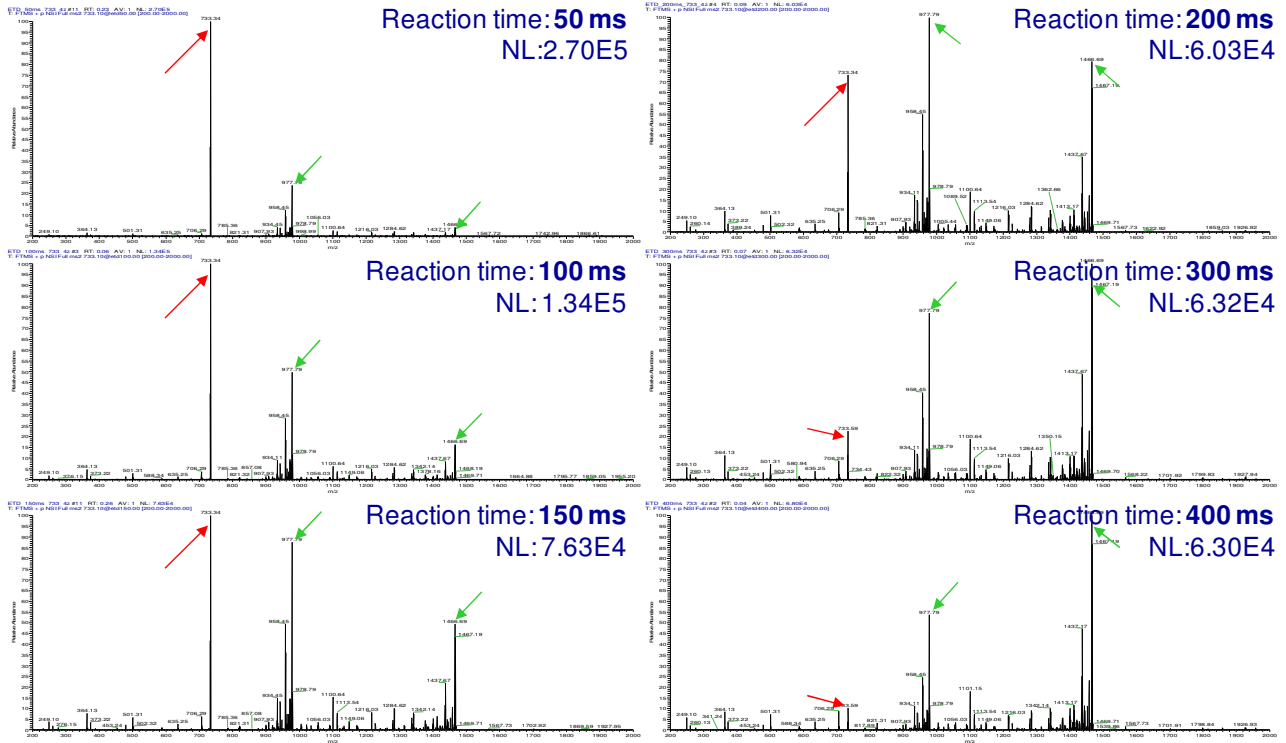

Continued.

ETD MS/MS of 905.9 m/z, +4

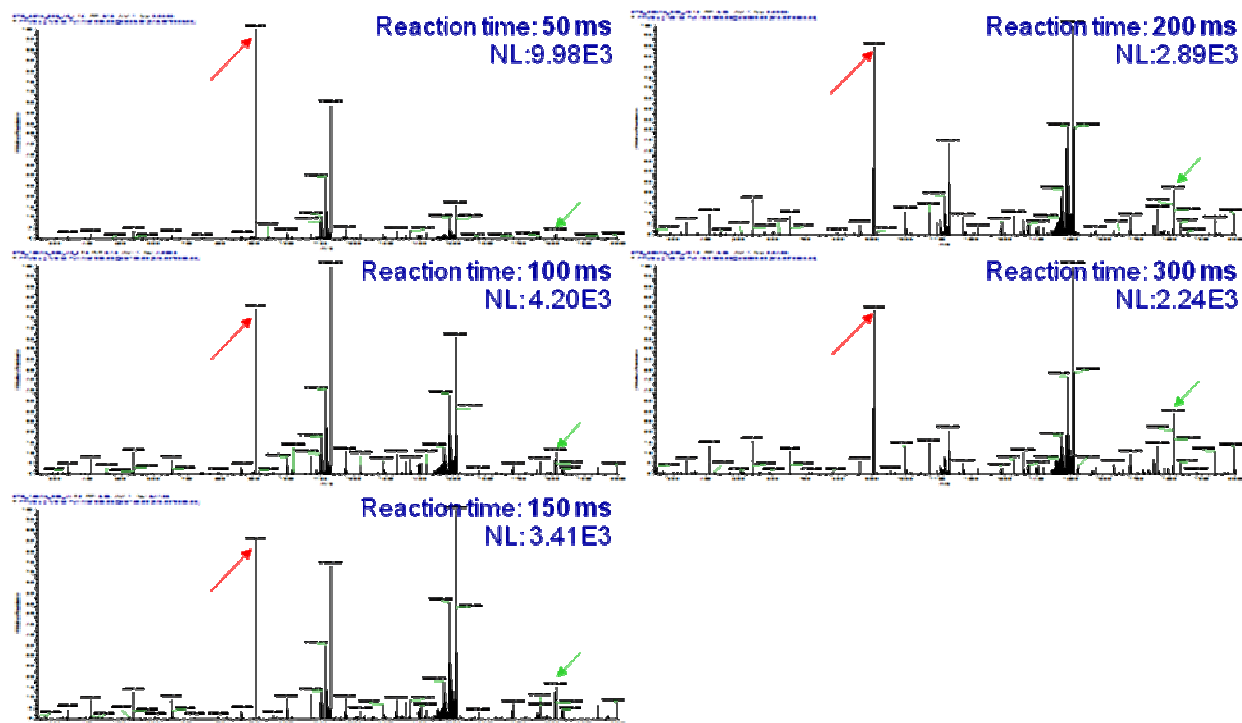

Continued.

### ETD MS/MS of 622.0 m/z, +2

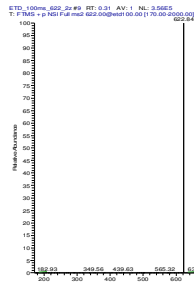

Reaction time: **100 ms**  
NL: **3.56E5**

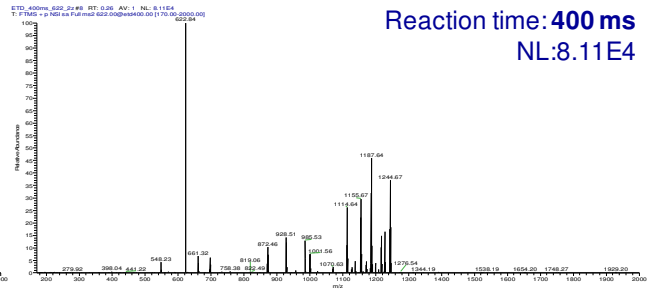

Reaction time: **400 ms**  
NL: **8.11E4**

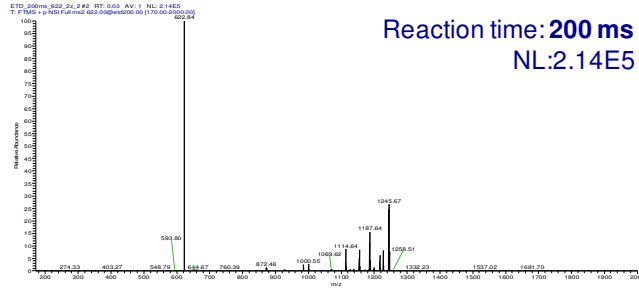

Reaction time: **200 ms**  
NL: **2.14E5**

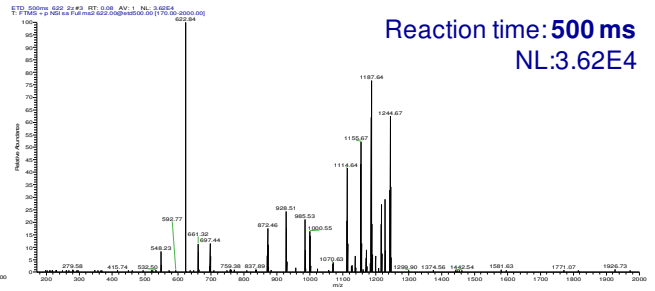

Reaction time: **500 ms**  
NL: **3.62E4**

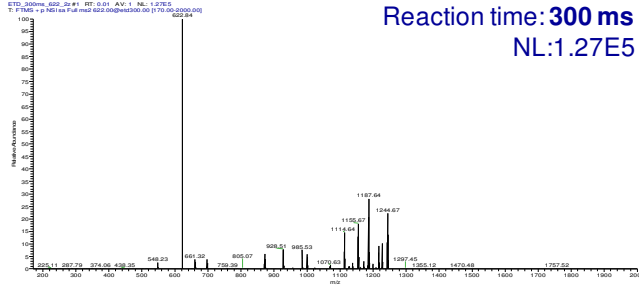

Reaction time: **300 ms**  
NL: **1.27E5**

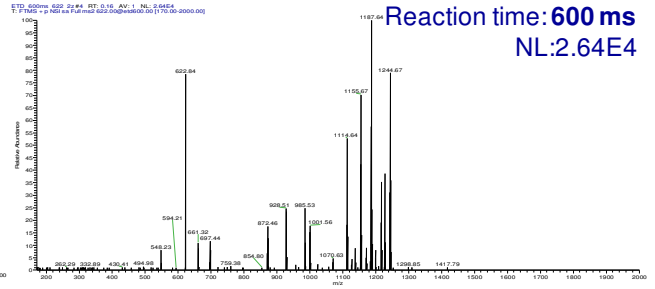

Reaction time: **600 ms**  
NL: **2.64E4**

Continued.

### ETD MS/MS of 861.4 m/z, +2

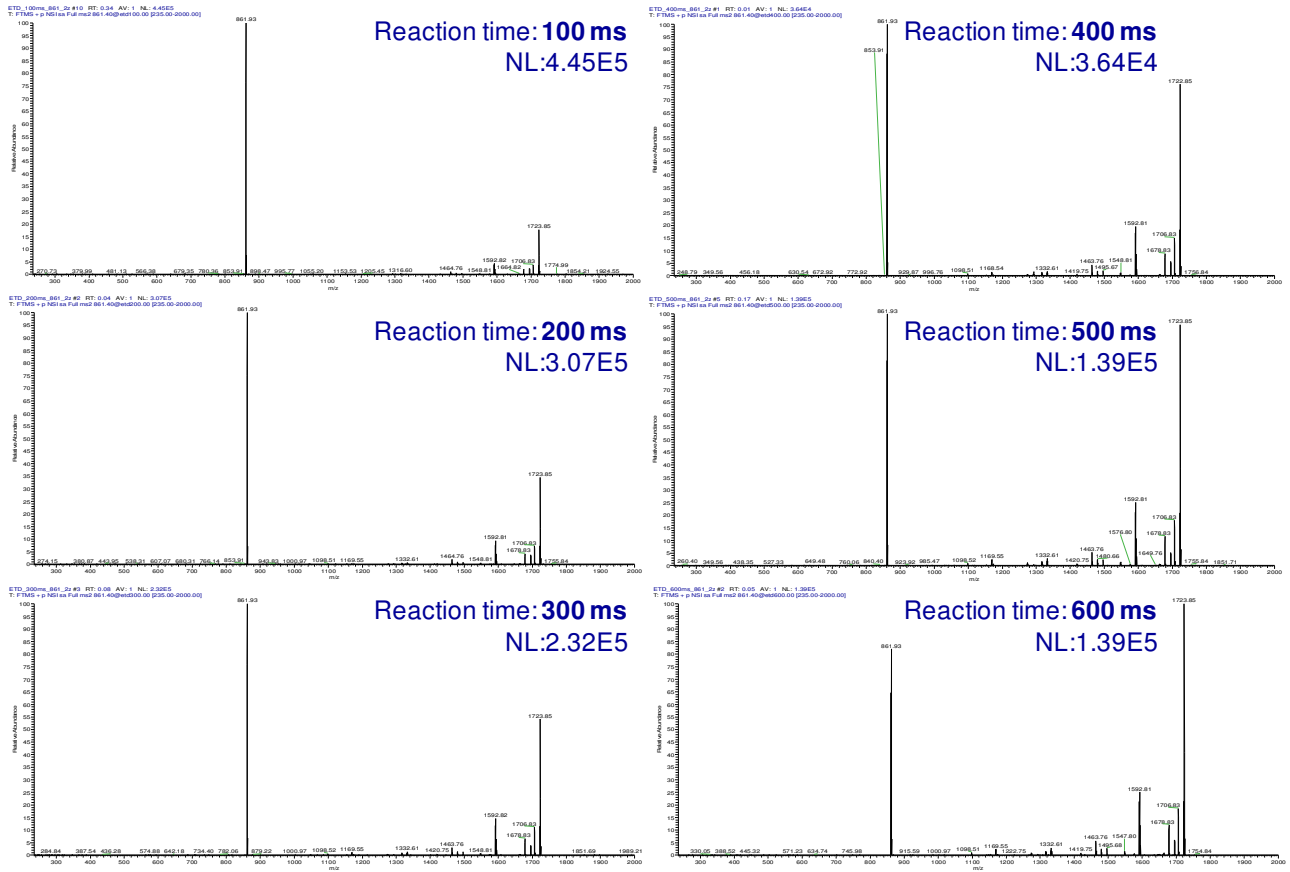

Conditions: the optimization was performed on a LTQ-Orbitrap Velos mass spectrometer (Thermo Fisher Scientific, San Jose, CA) with the instrument default CS 2 and with the supplementary activation enabled; the BSA Glu-C digest was used for this optimization.

**Supporting Figure 2.** The peptide overlaps between the CID, HCD, and ETD SEQUEST peptide subsets obtained with use of reverse and scrambled decoy databases for peptide identification.

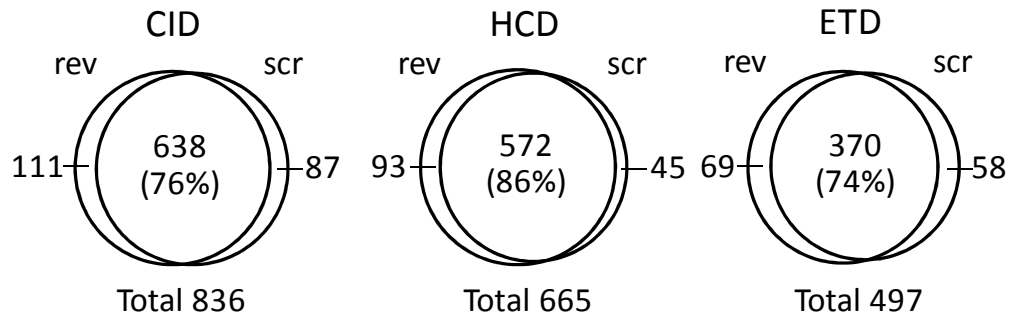

Conditions: mass tolerances of [5Da, 0.05Da] were used for the database search and all identifications were based upon 1% FDR. “rev” and “scr” represent the reverse database and scrambled database were used for peptide identification, respectively.

**Supporting Figure 3.** The GRAVY and  $pI$  distributions of peptides identified from the SEQUEST, Mascot, and UStags peptide identification methods.

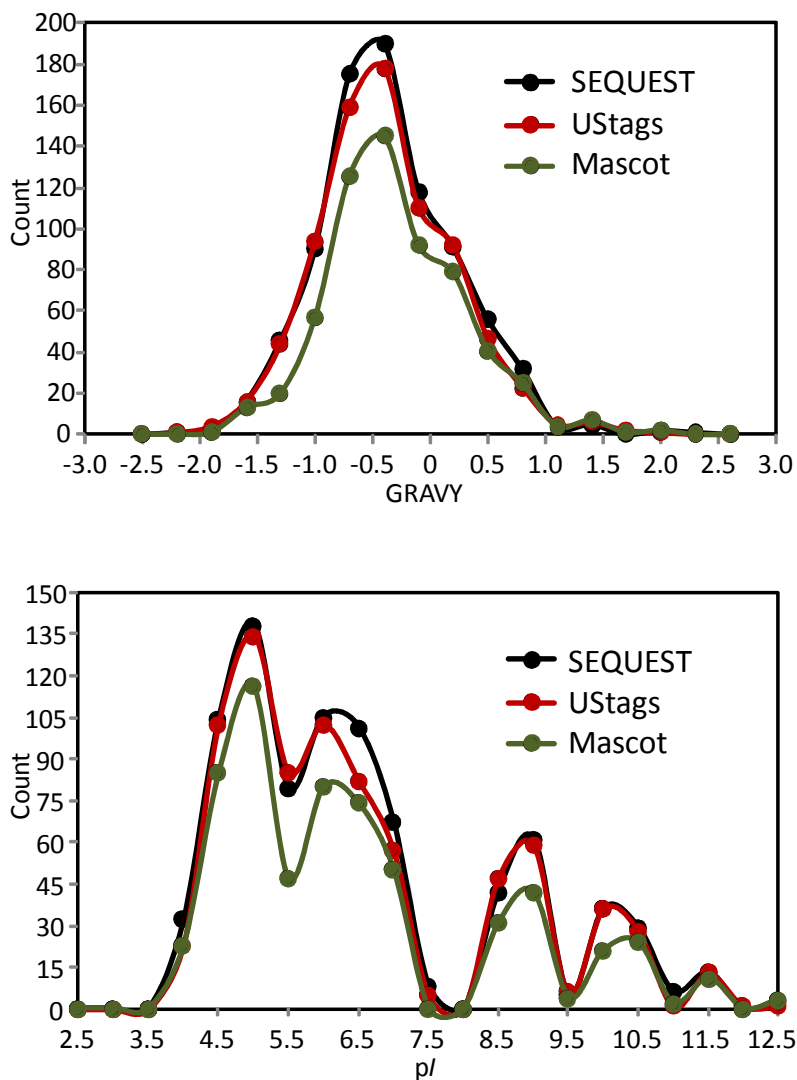

Conditions: the peptide dataset  $[5\text{Da}, 0.05\text{Da}]_{F,r}$  from 0% FDR SEQUEST,  $[5\text{Da}, 0.05\text{Da}]_{U,r}$  from UStags, and  $[50\text{ppm}, 0.05\text{Da}]_{F,r}$  from 1% FDR Mascot methods were used for this examination.

**Supporting Figure 4.** Distributions of the MW and amino acid at peptide P1 position for peptides identified from the SEQUEST, Mascot, and UStags peptide identification methods.

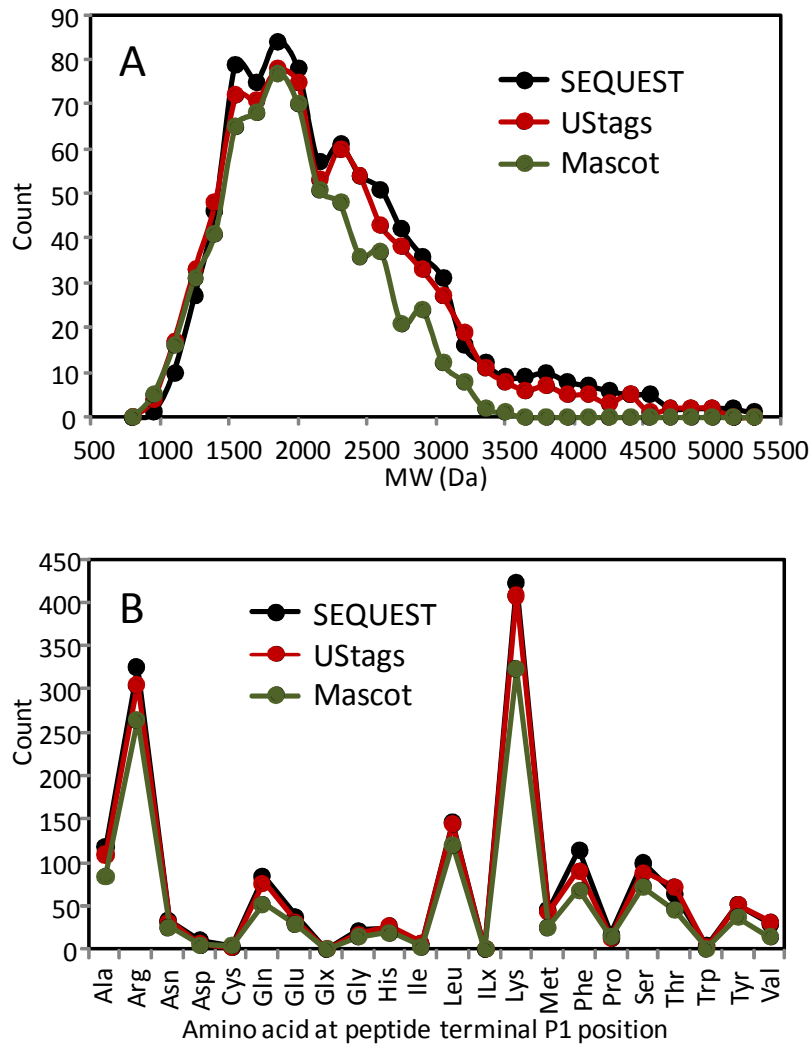

Conditions: the peptide dataset  $[5\text{Da}, 0.05\text{Da}]_{F,r}$  from 0% FDR SEQUEST,  $[5\text{Da}, 0.05\text{Da}]_{U,r}$  from UStags, and  $[50\text{ppm}, 0.05\text{Da}]_{F,r}$  from 1% FDR Mascot methods were used for this examination.



**Supporting Figure 5.** The contributions of CID, HCD, and ETD and variances of peptide subsets containing with Arg and Lys at two P1 positions of peptide termini.

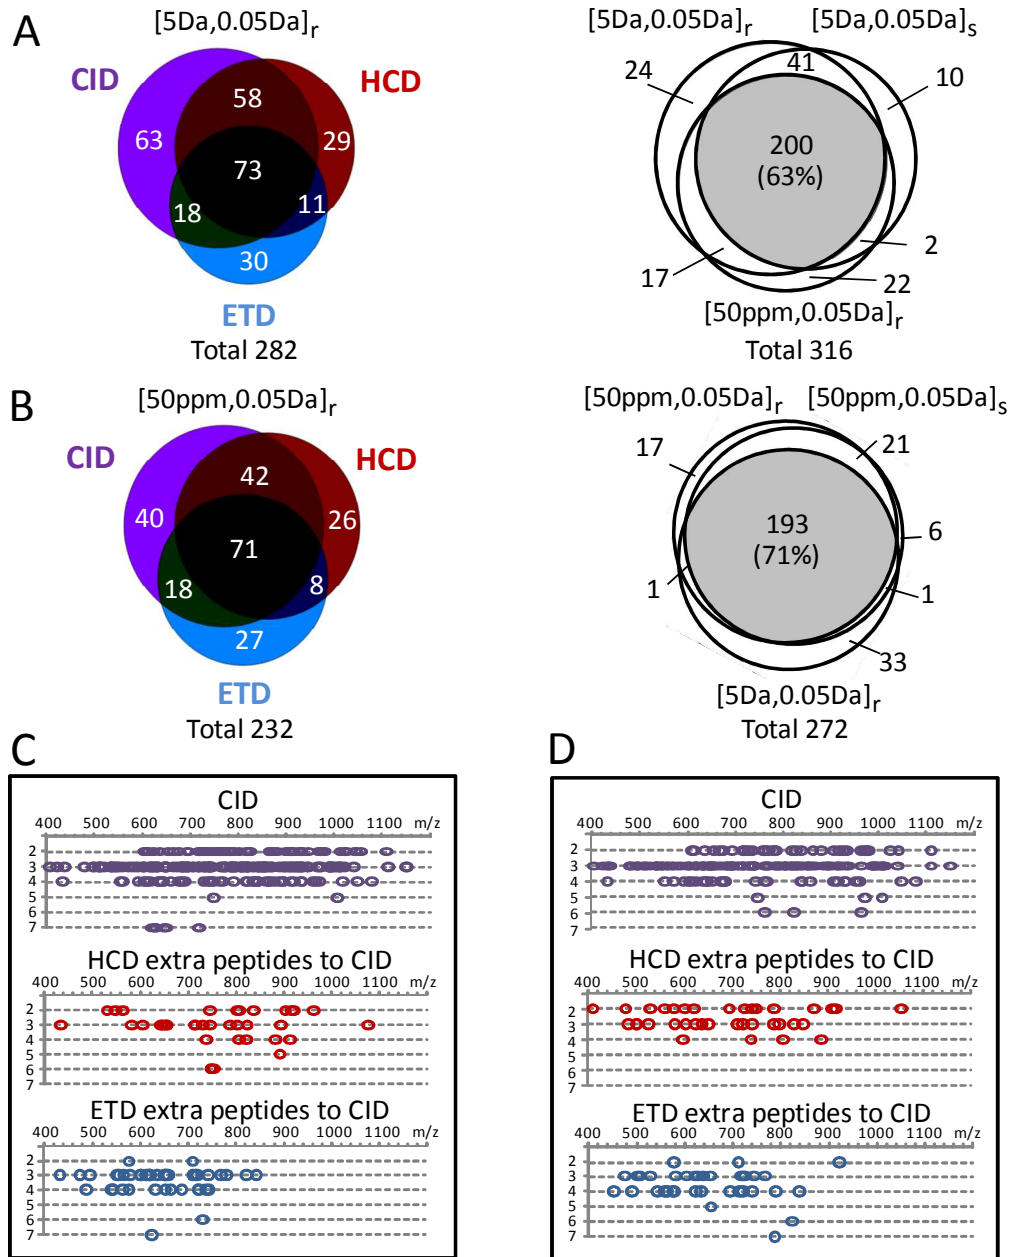

Conditions: peptides were identified on 2% FDR level with use of “trypsin rule” for database search and peptide validation; other conditions were the same as described in the text. (A) SEQUEST peptides and their overlaps, (B) Mascot peptides and their overlaps, (C) SEQUEST [5Da,0.05Da]<sub>r</sub> peptide distributions, and (D) Mascot [50ppm,0.05Da]<sub>r</sub> peptide distributions.
